# Supplementary figures and images for: Super-Resolution of Magnetic Resonance Images via Convex Optimization with Local and Global Prior Regularization and Spectrum Fitting
Source: Hindawi journal article supplement (doi:10.1155/2018/9262847), 2018-09-02

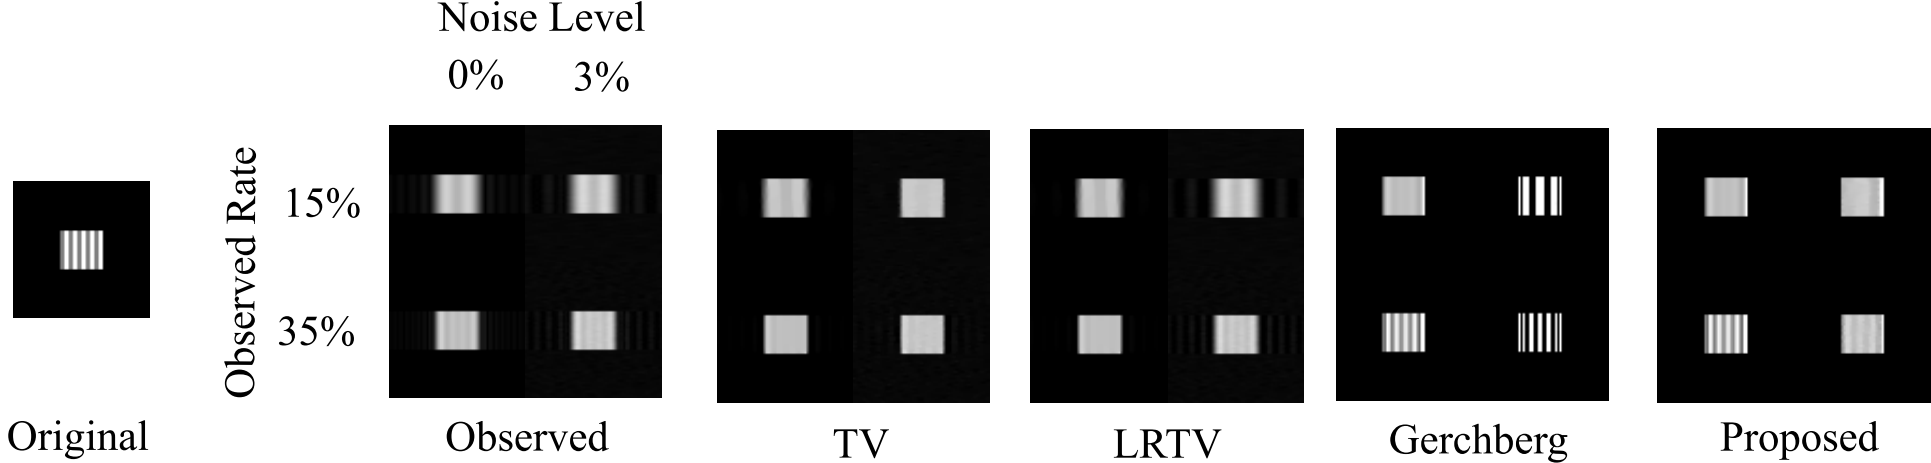

(A)

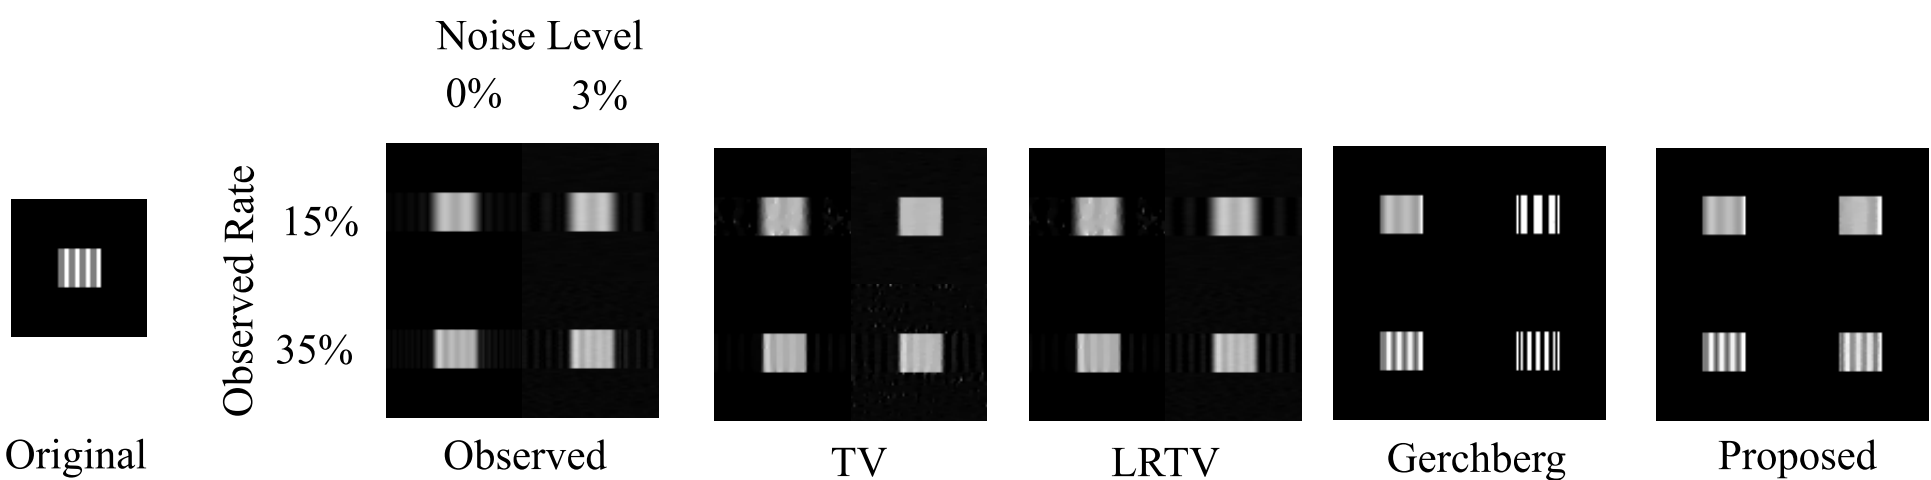

(B)

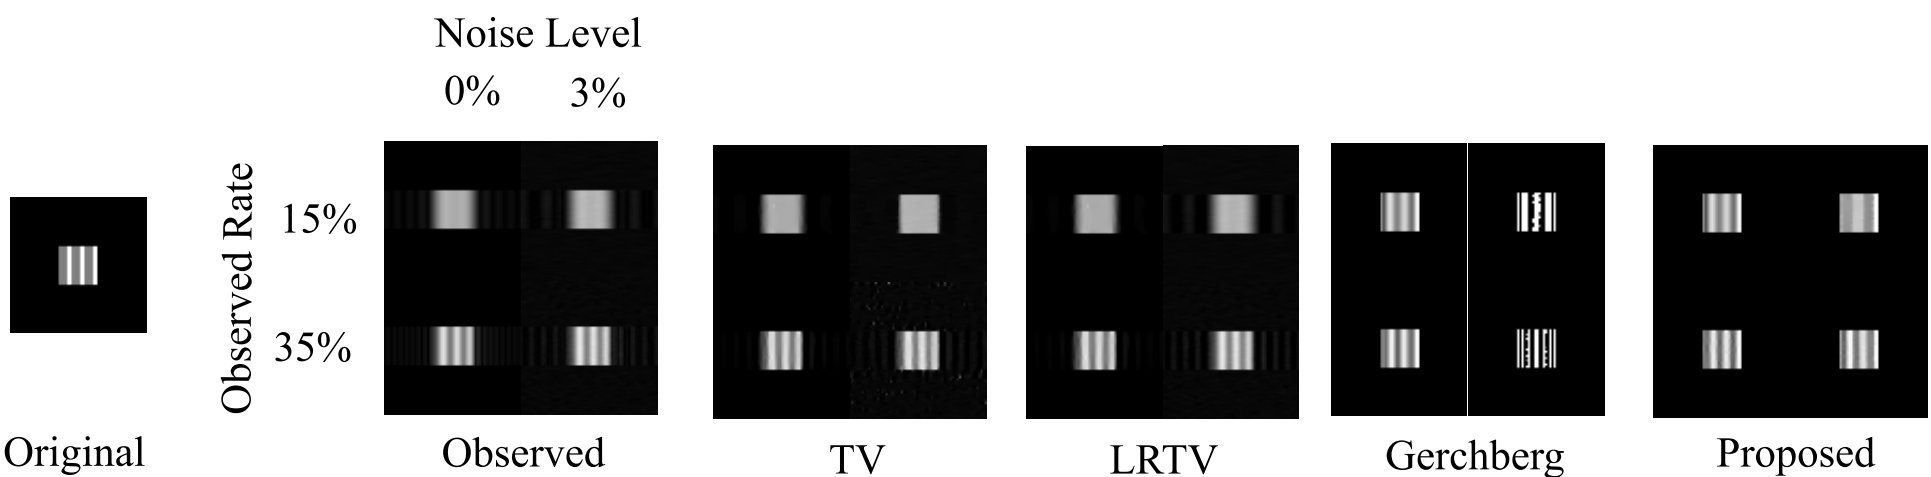

(C)

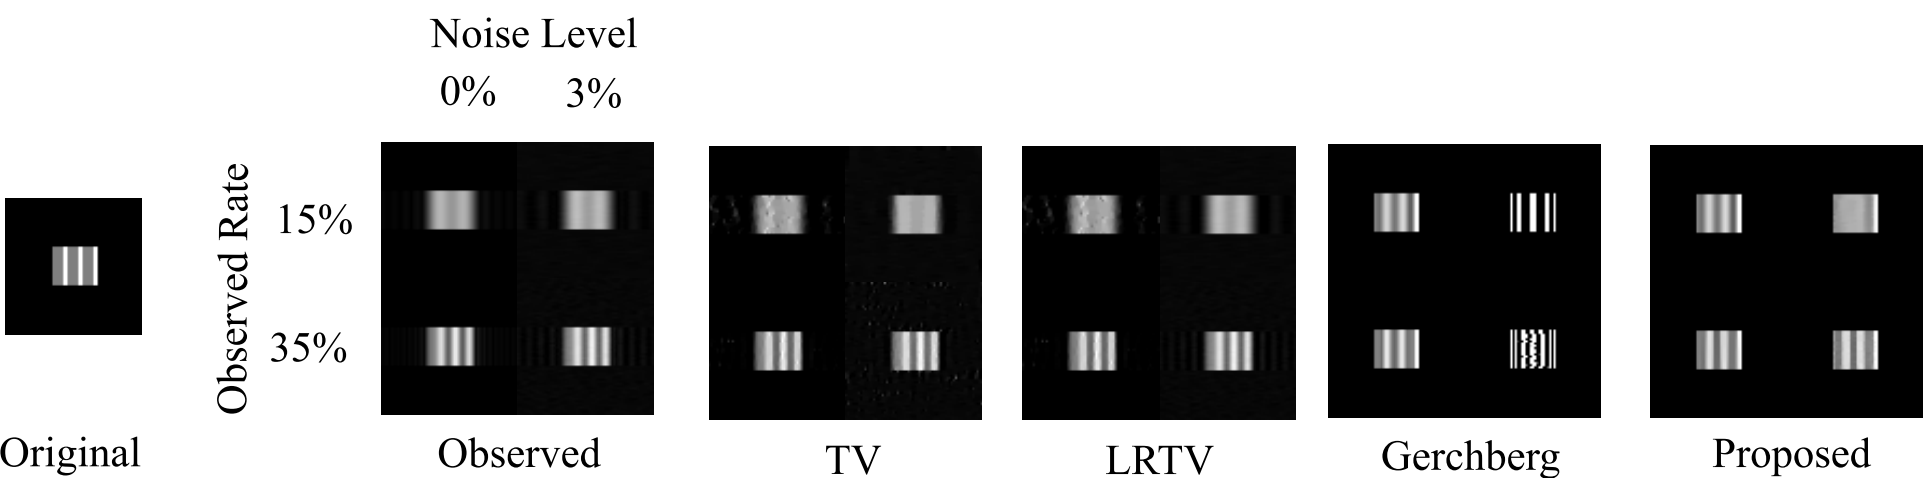

(D)

Supplement: f1 [file 9262847.f1.zip]

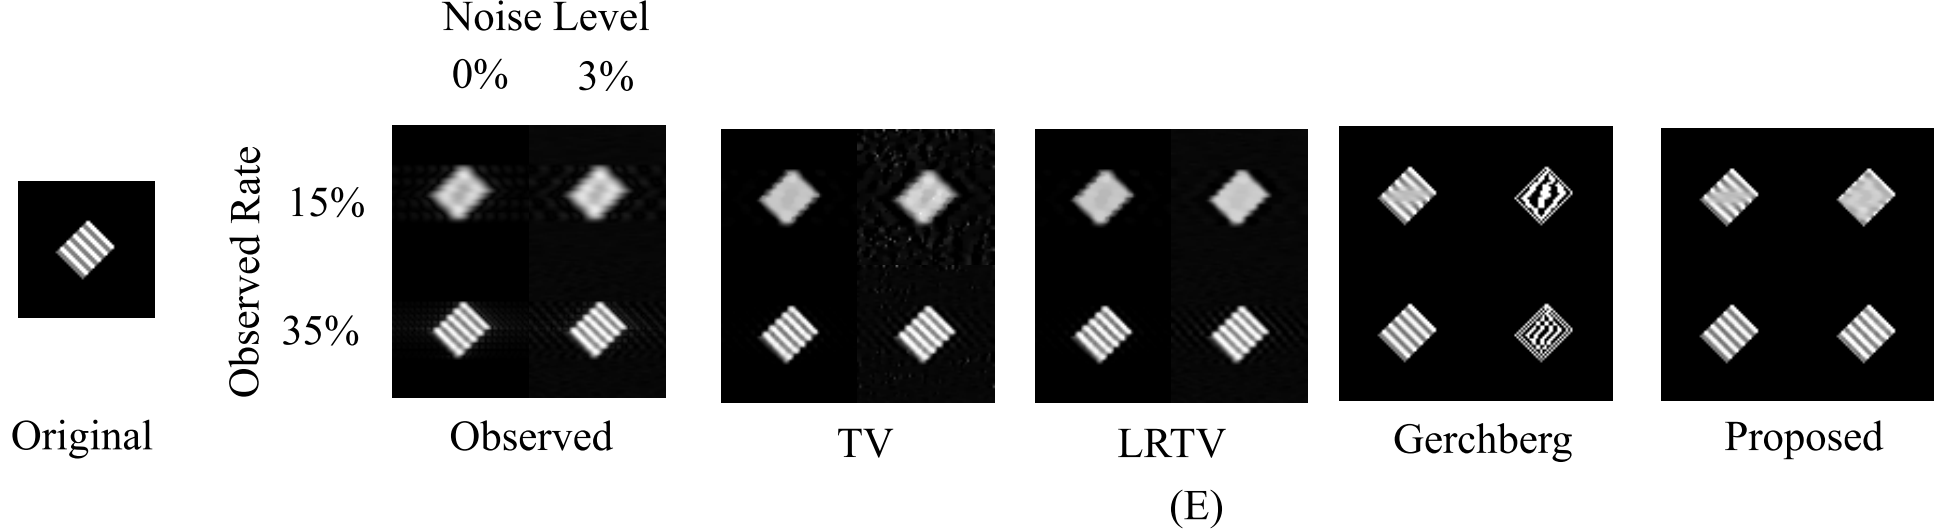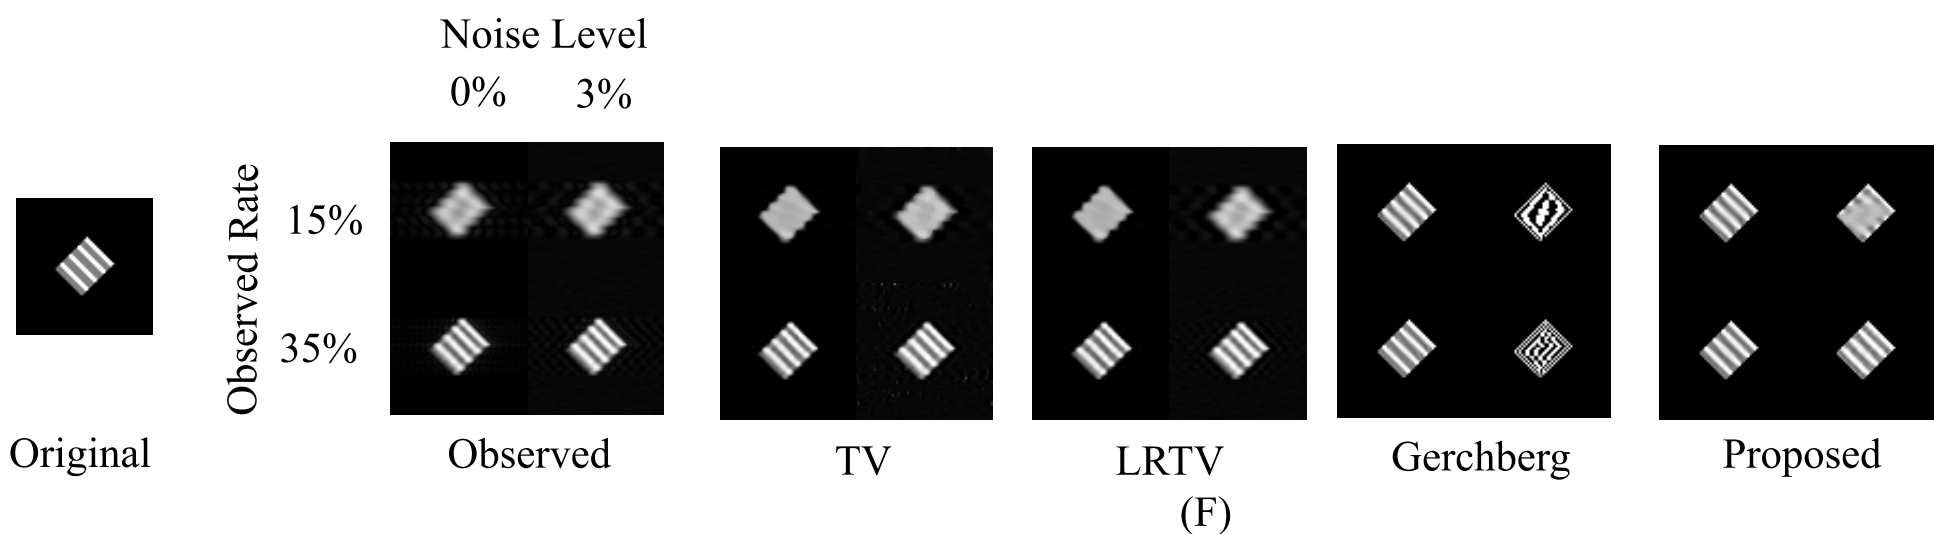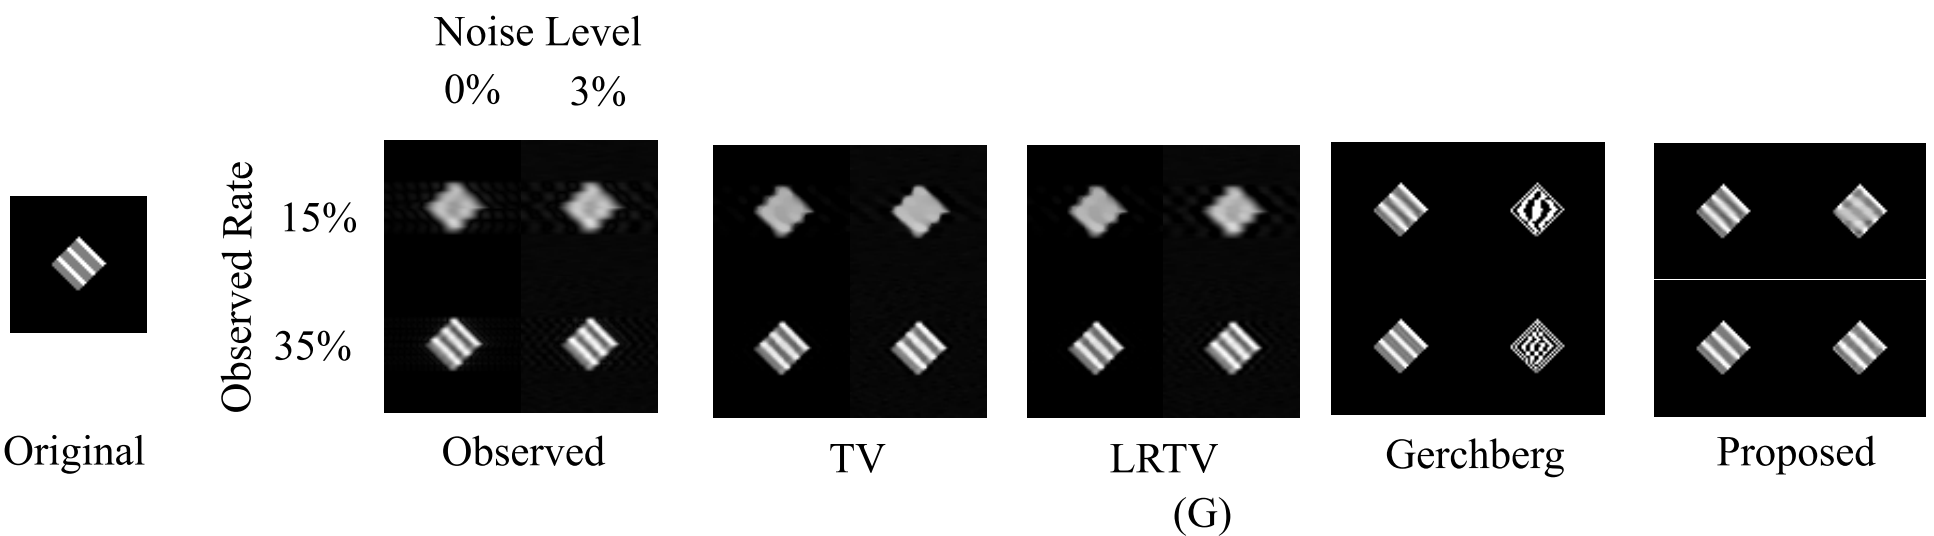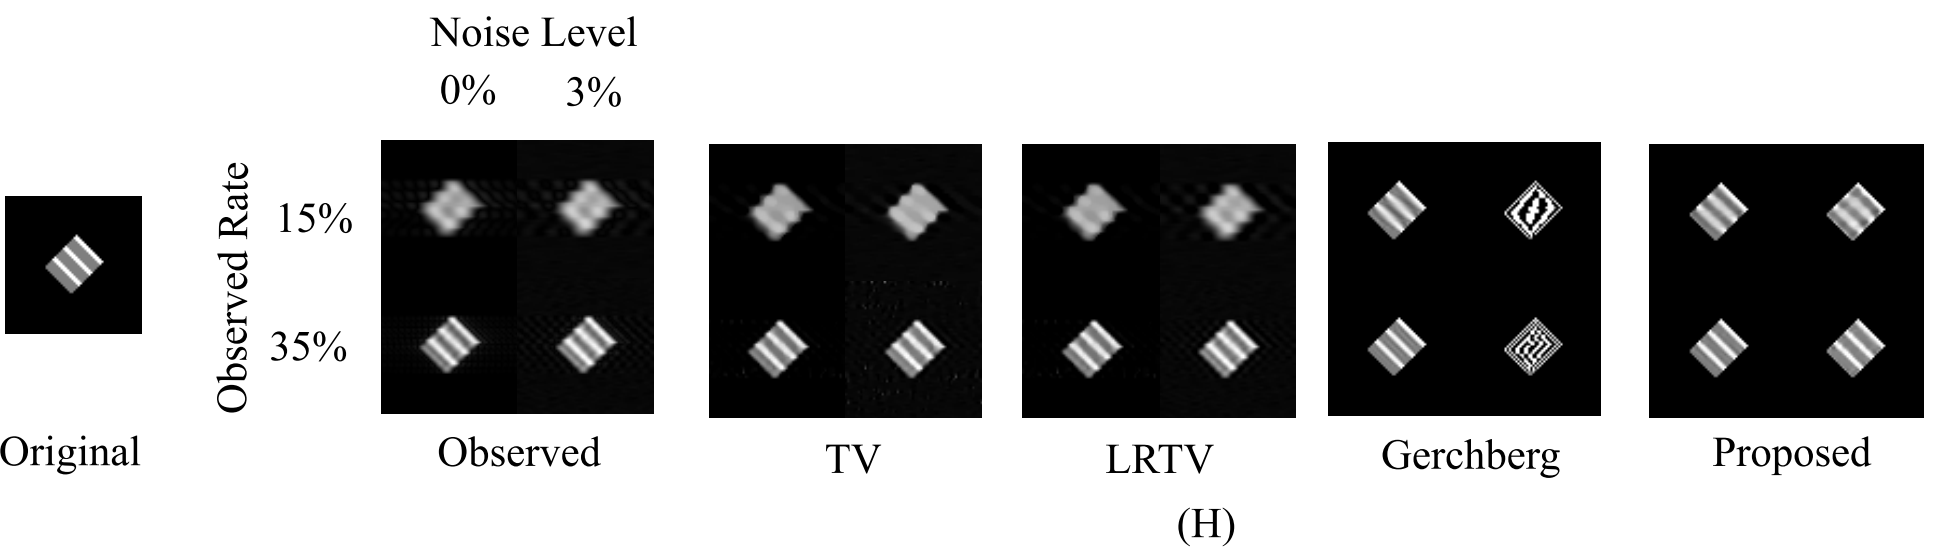

Supplement: f1 [file 9262847.f1.zip]

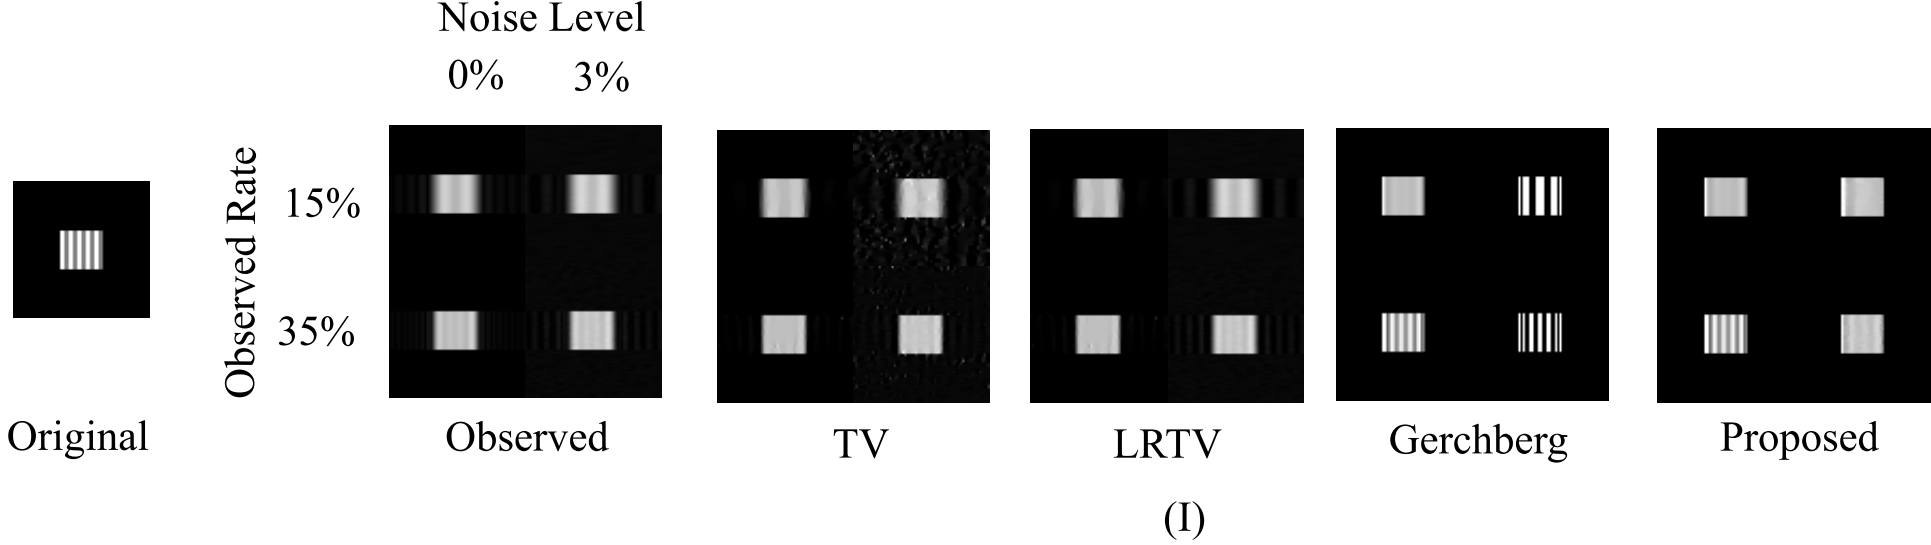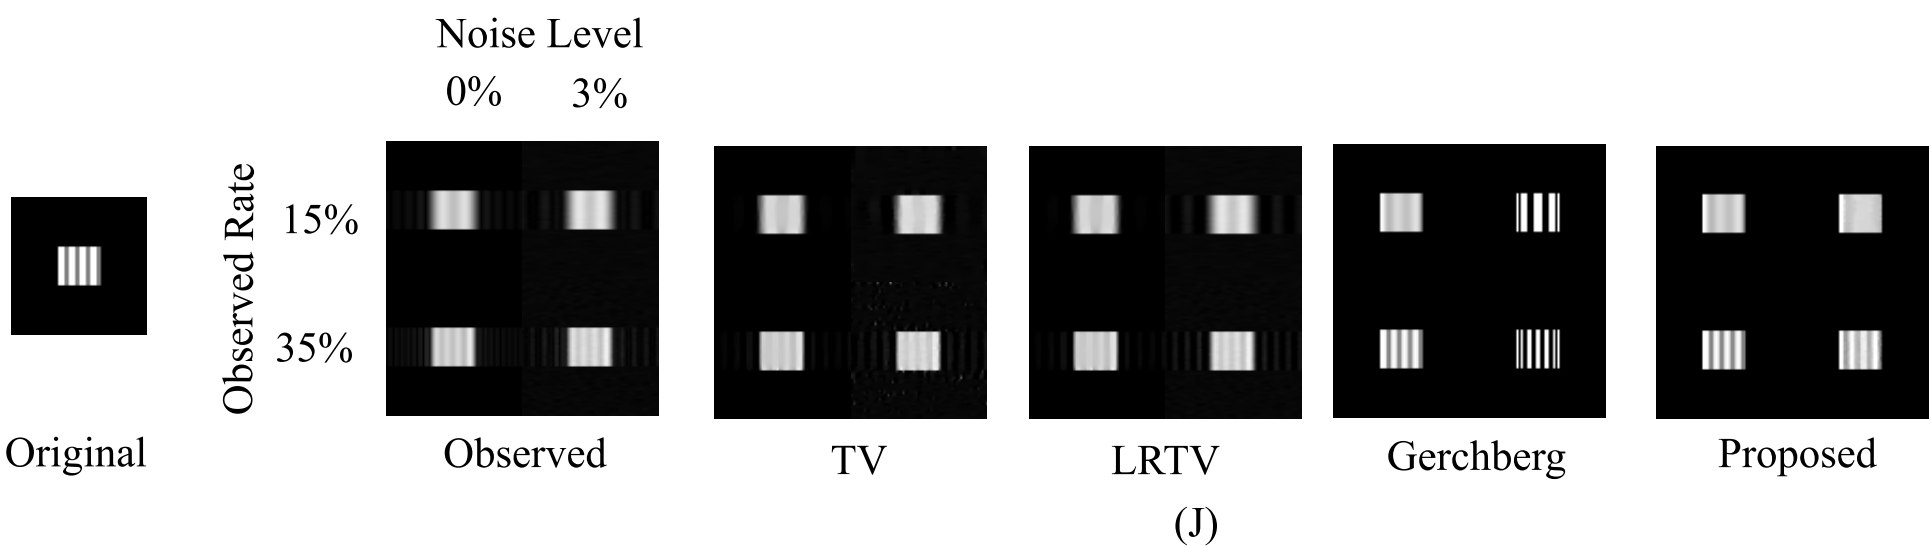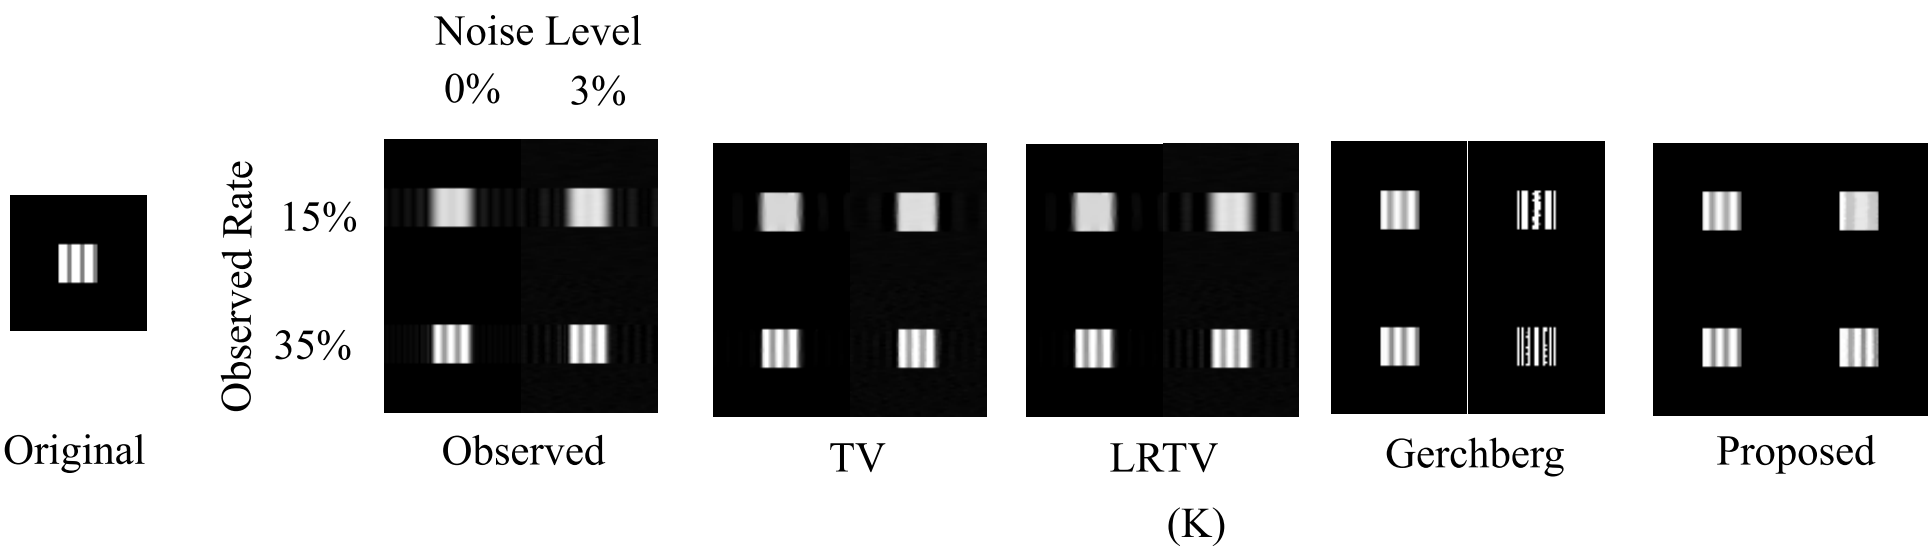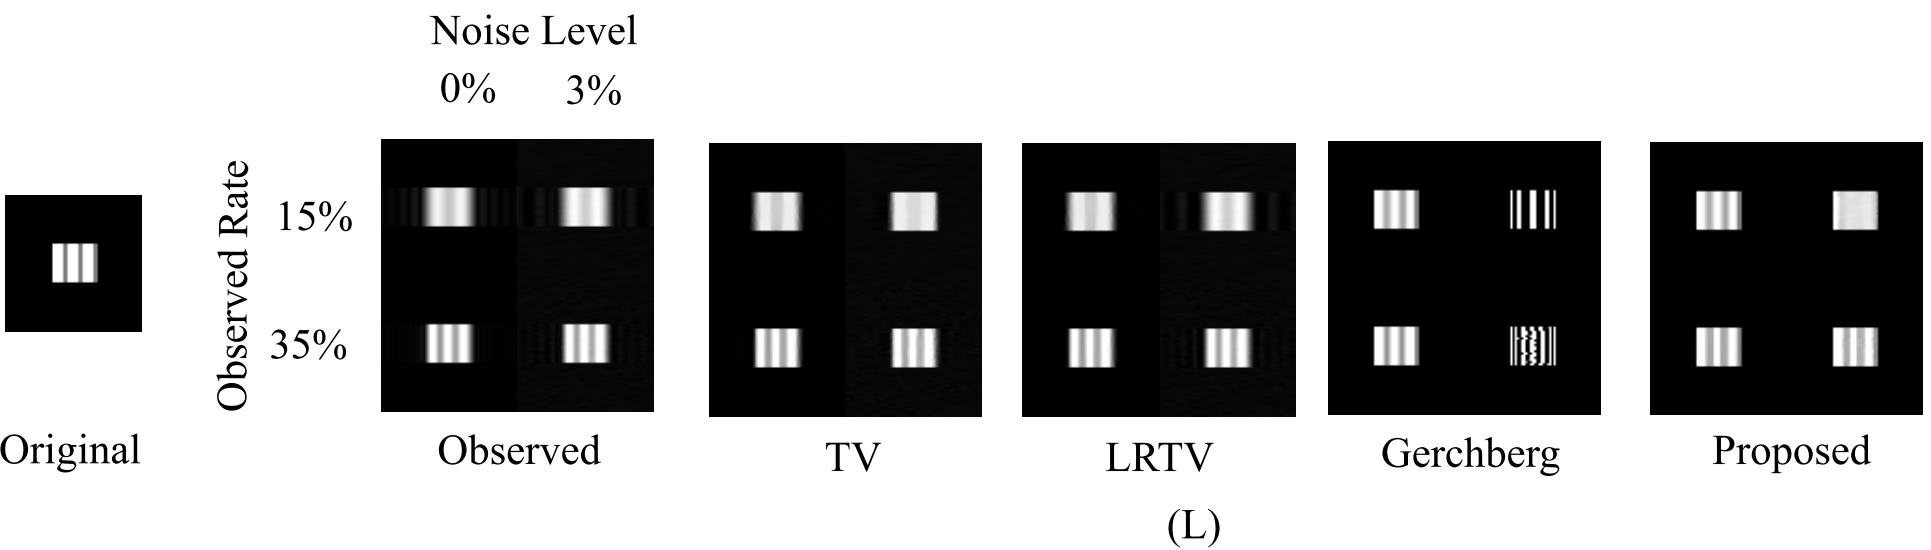

Supplement: f1 [file 9262847.f1.zip]

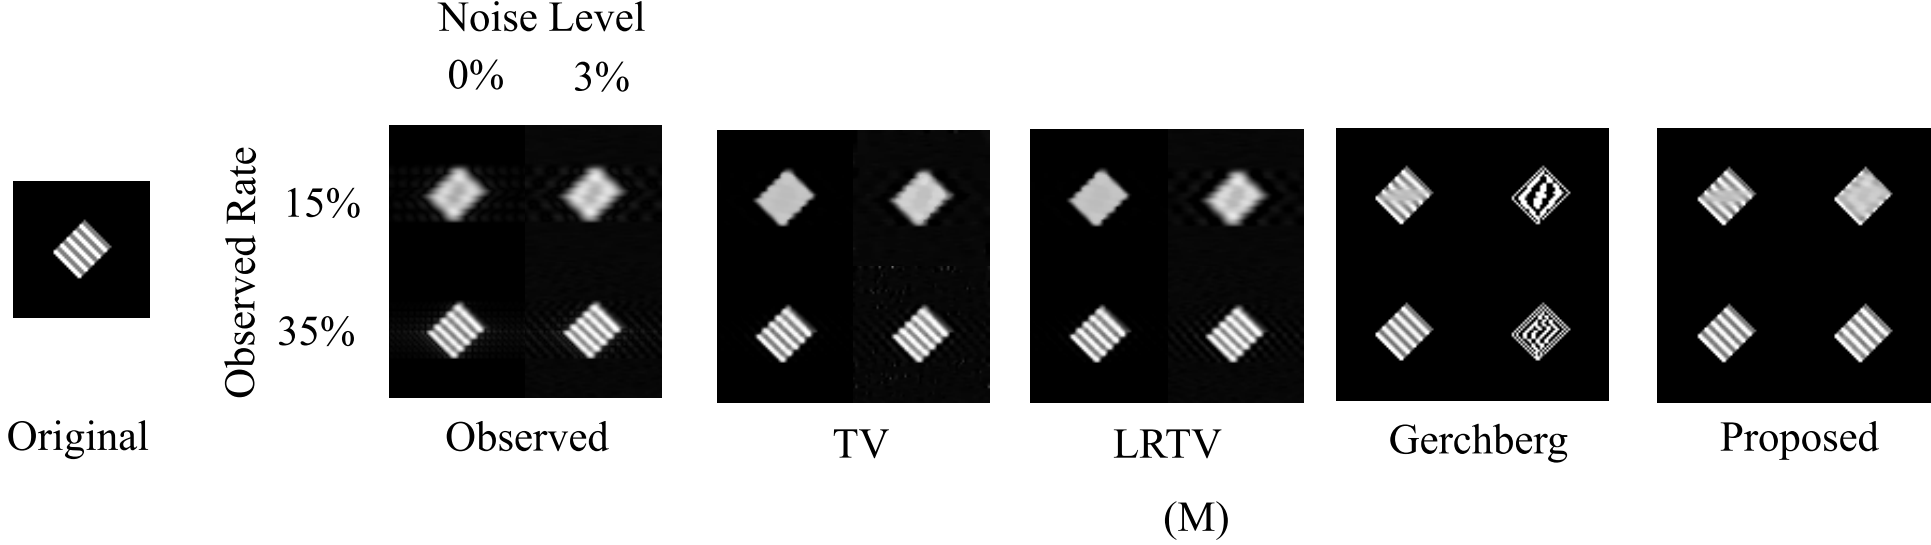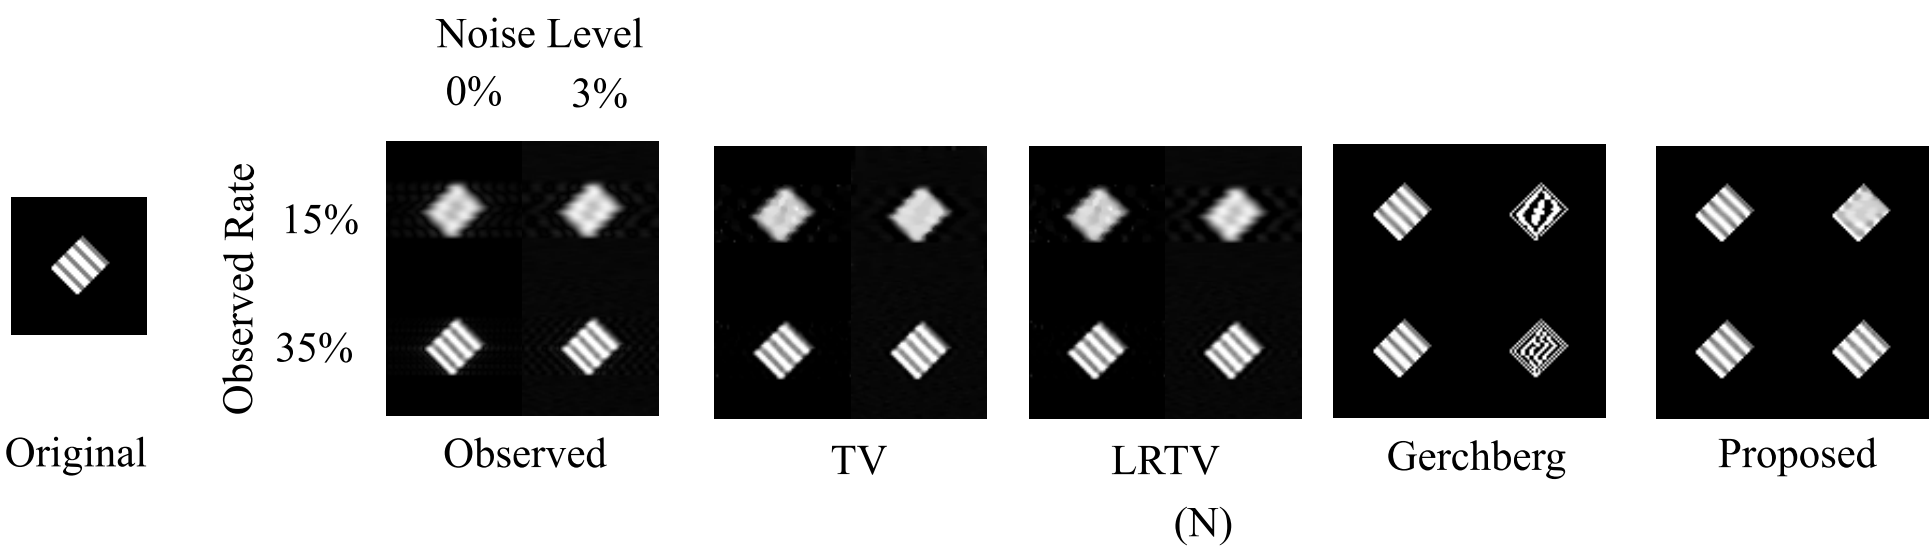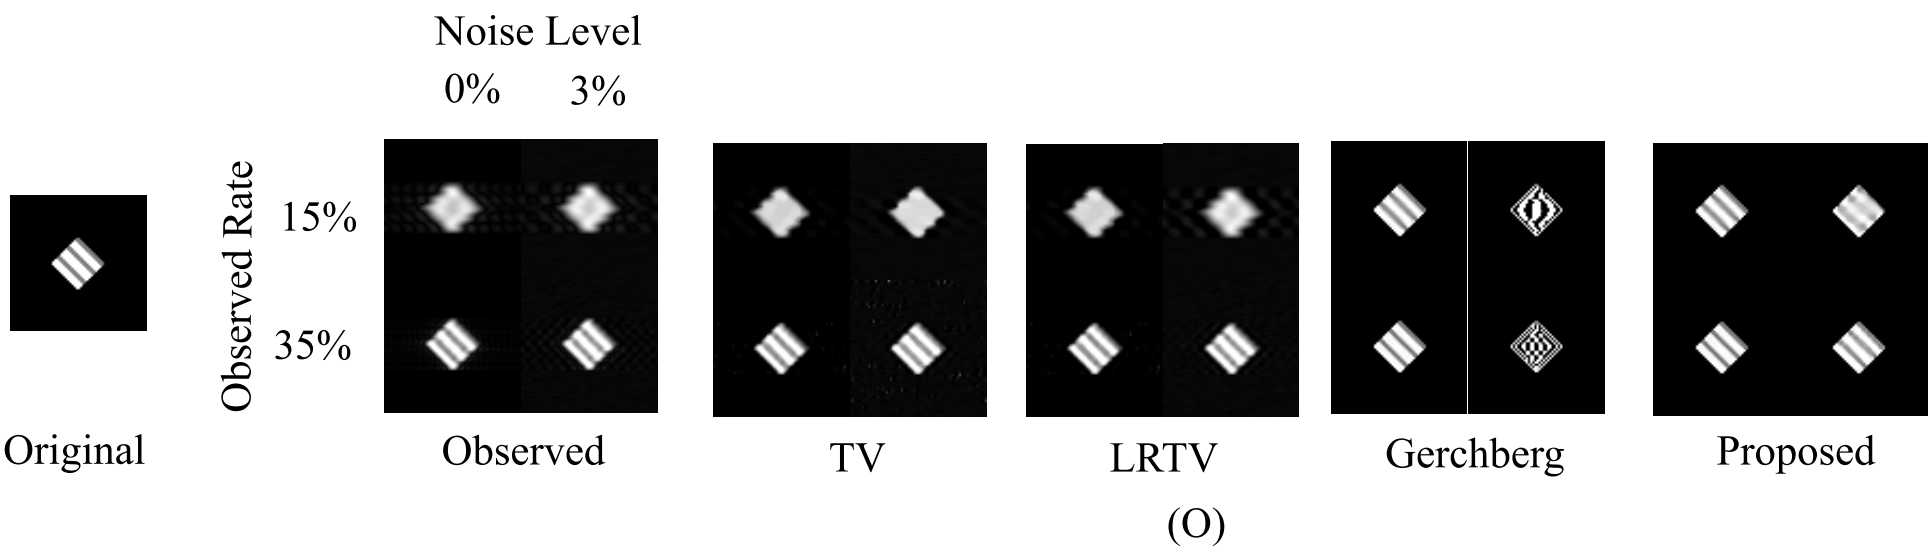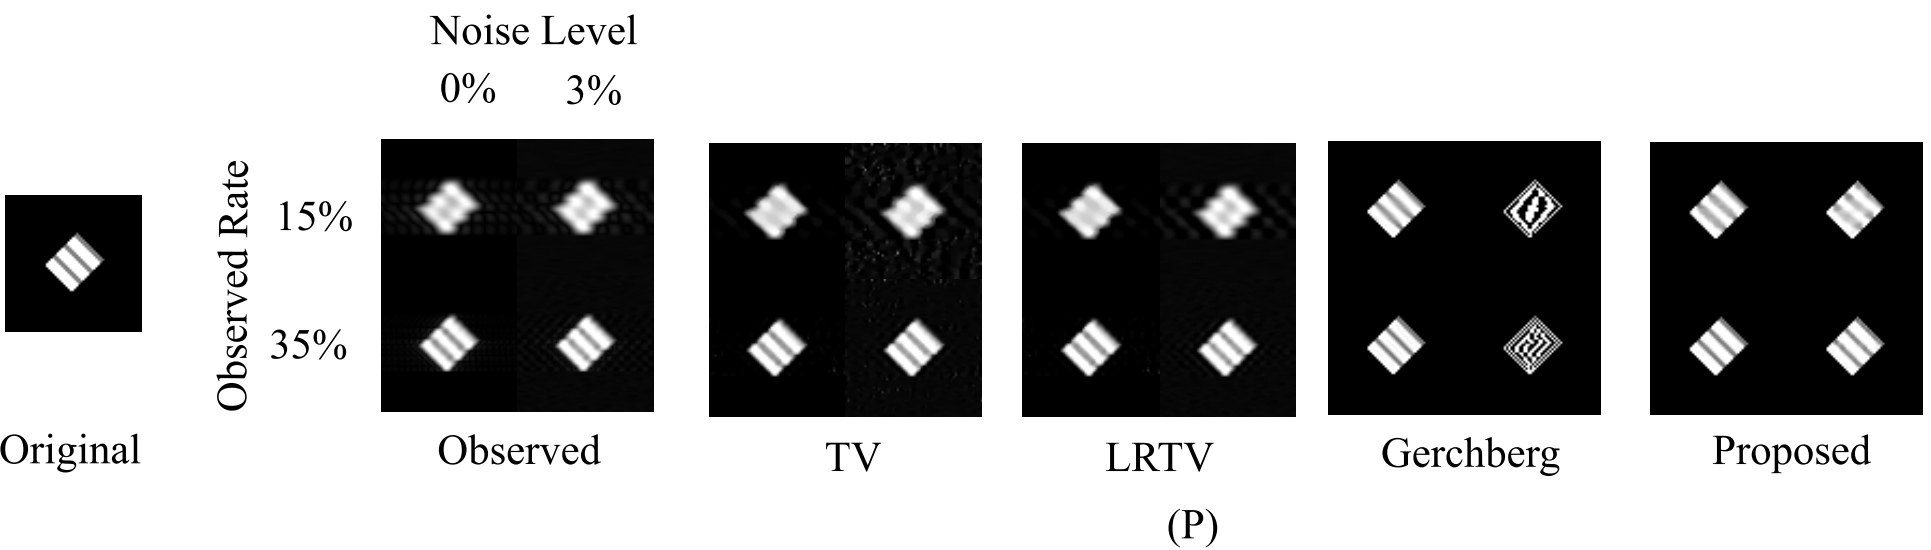

Supplement: f1 [file 9262847.f1.zip]

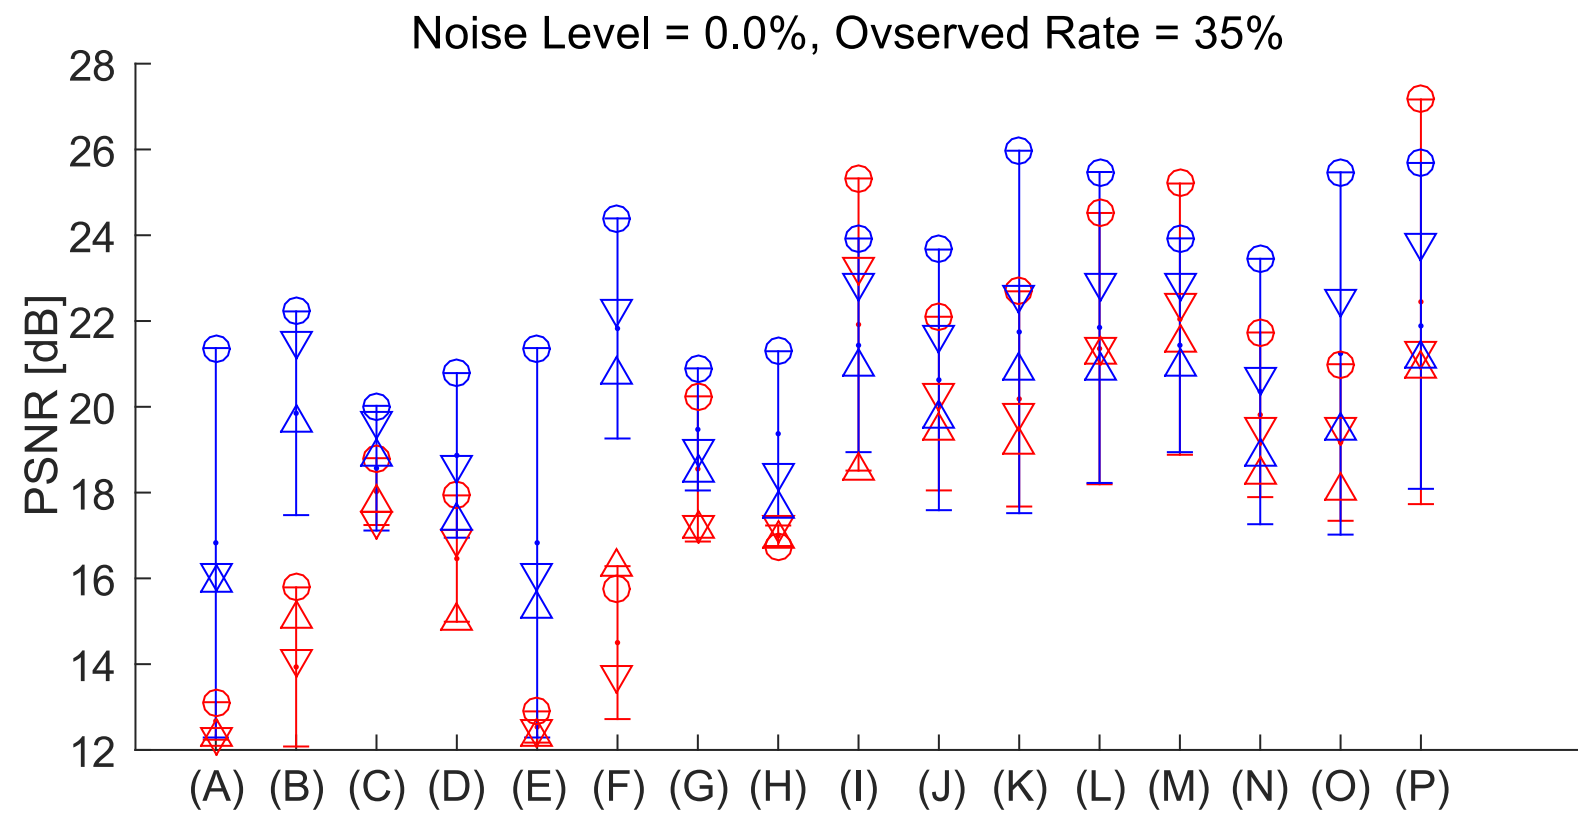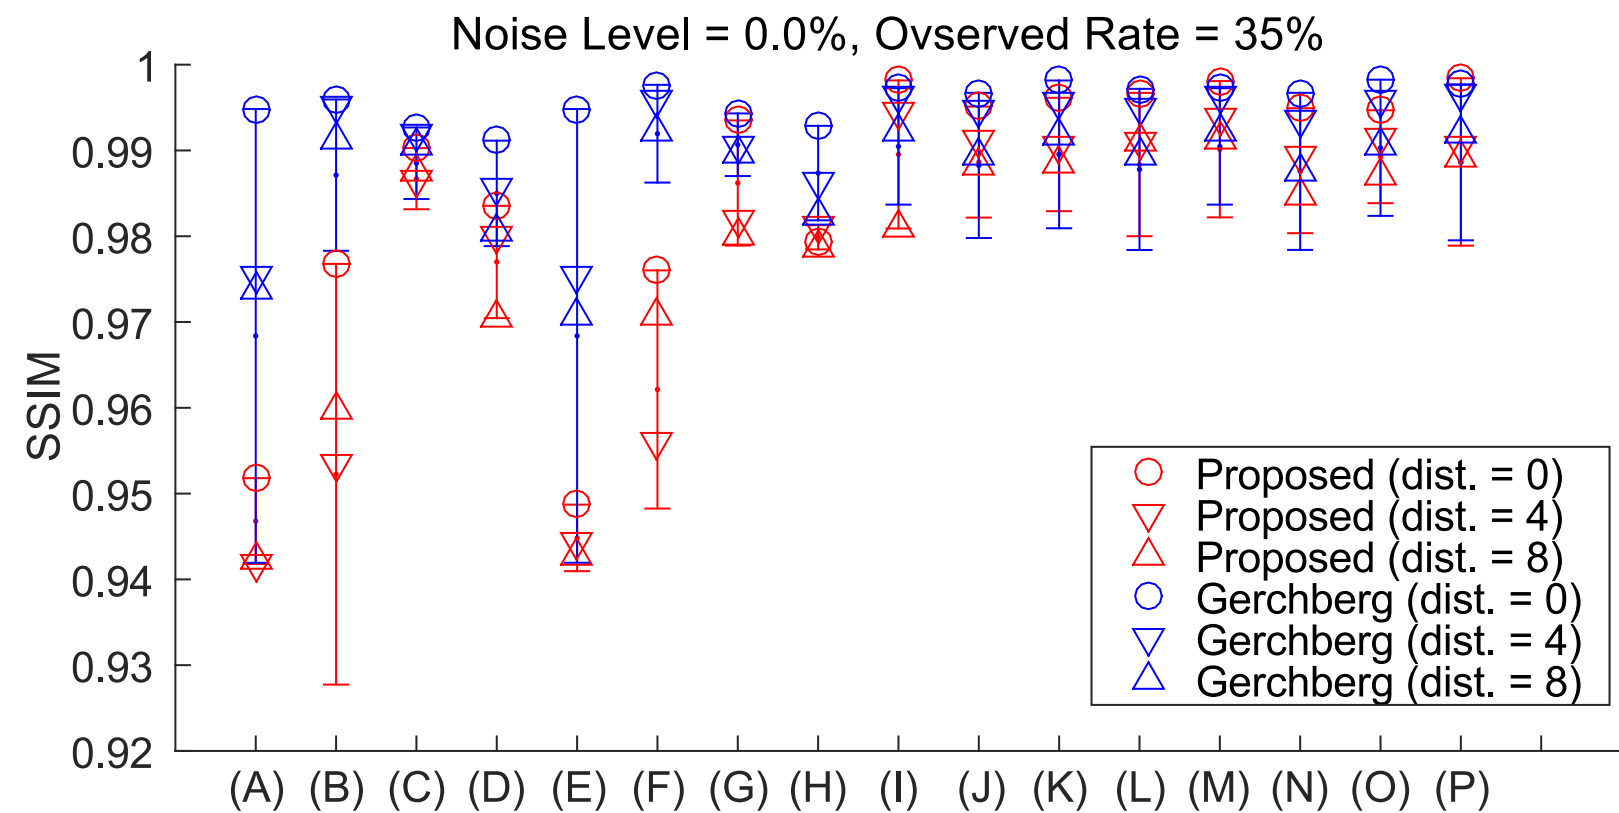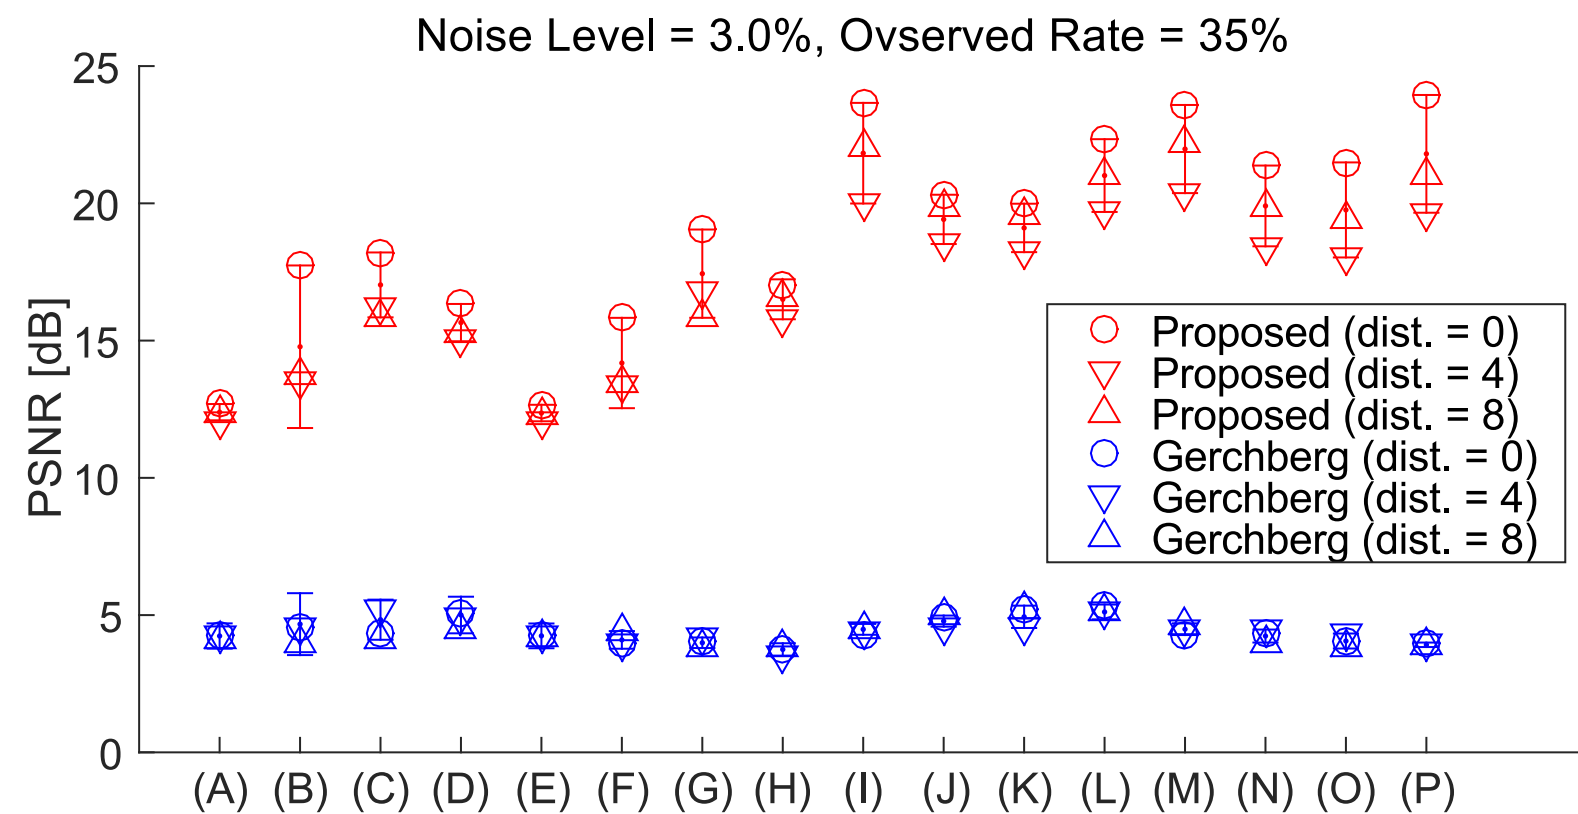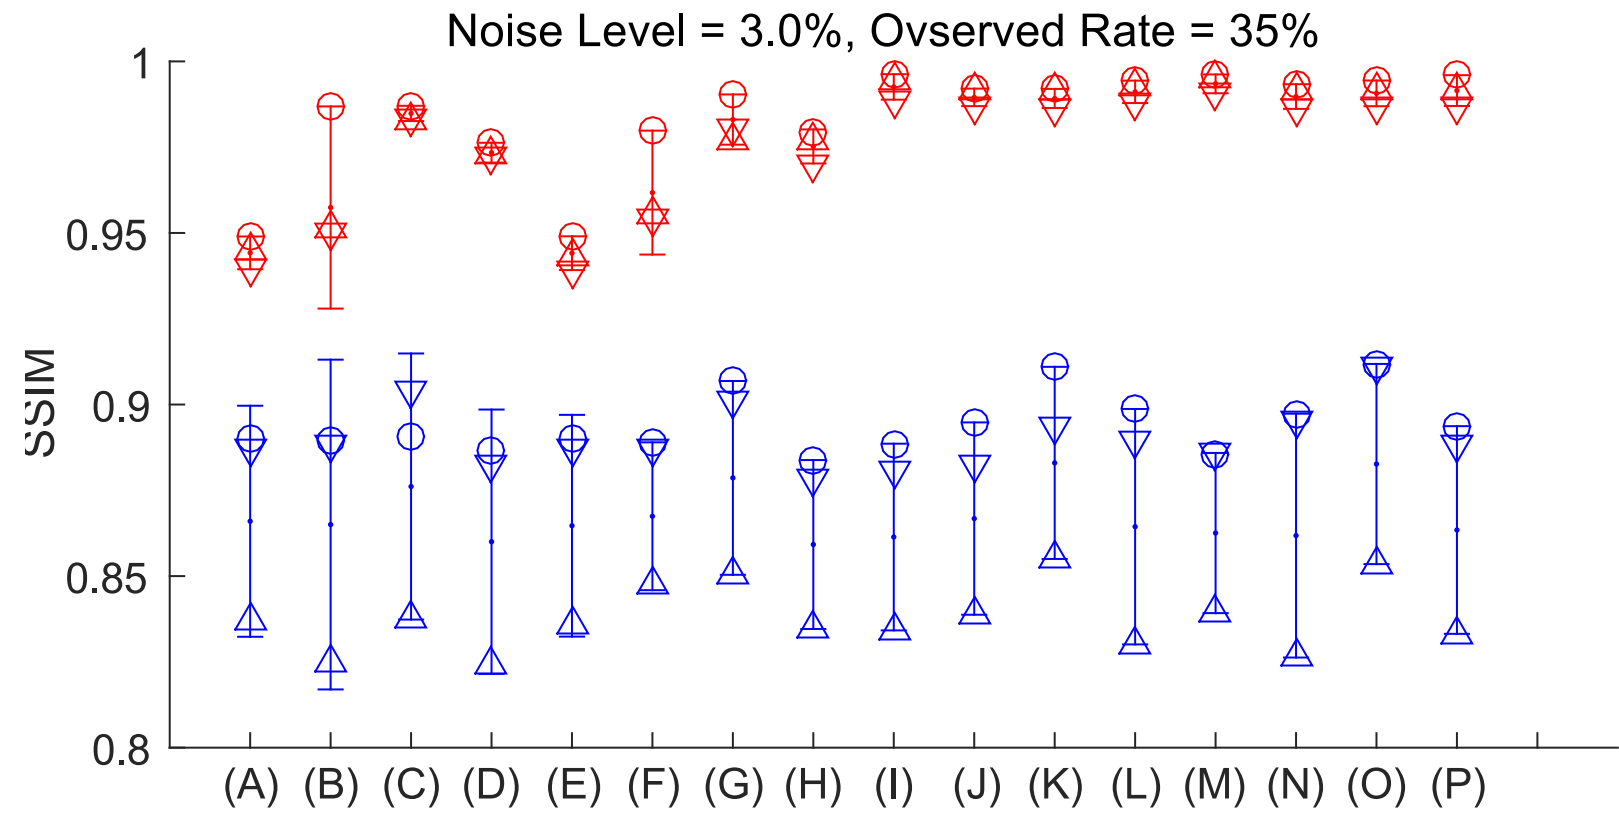

Supplement: f1 [file 9262847.f1.zip]

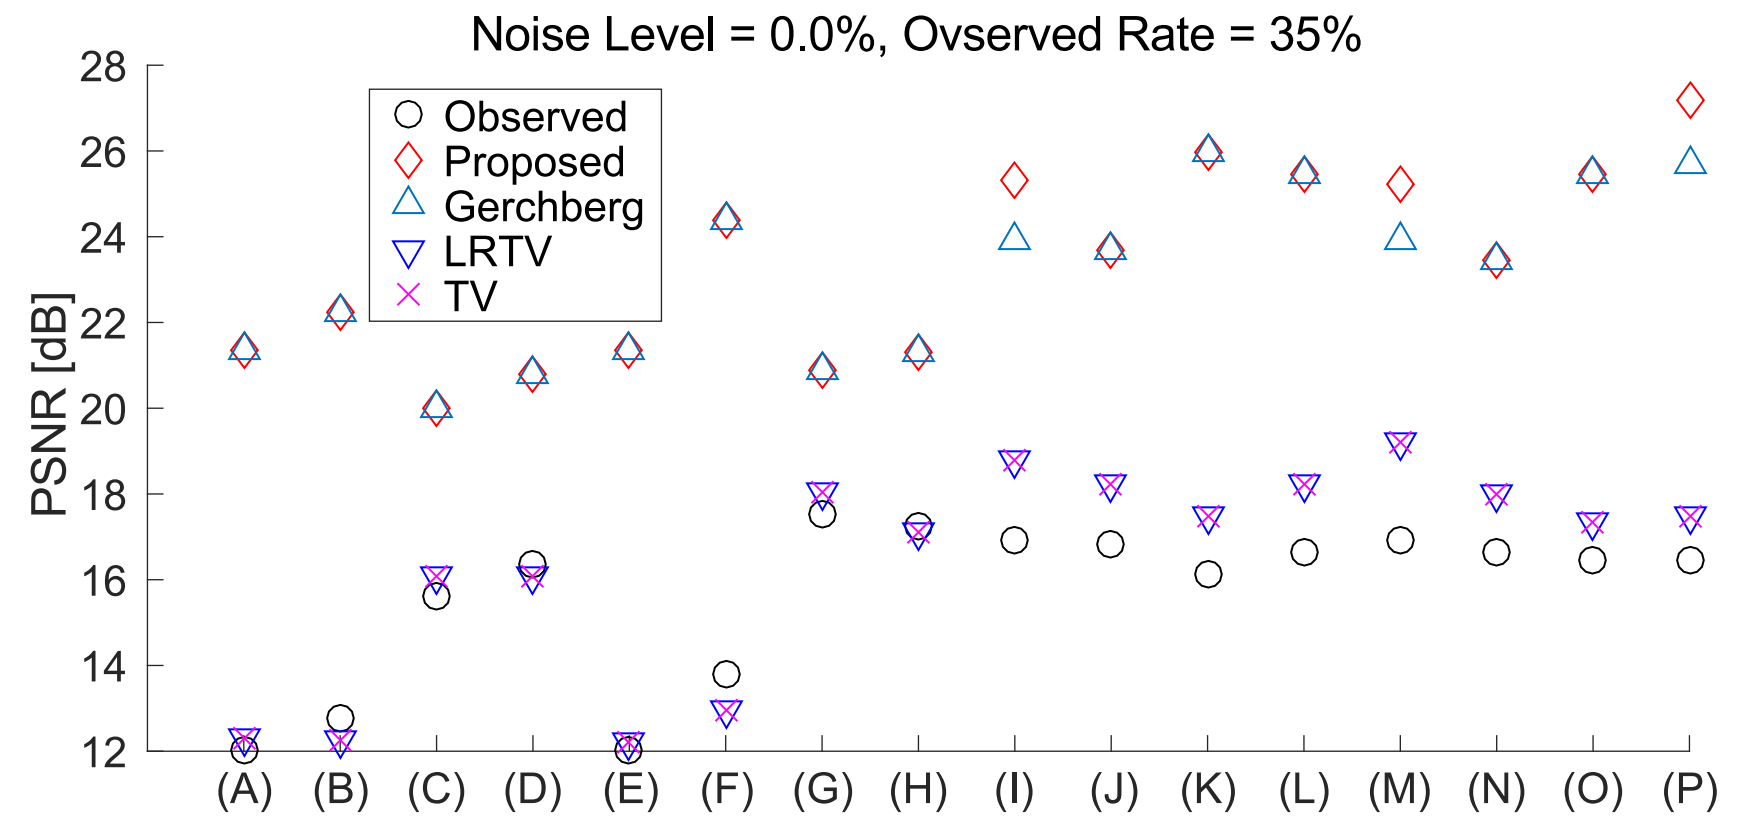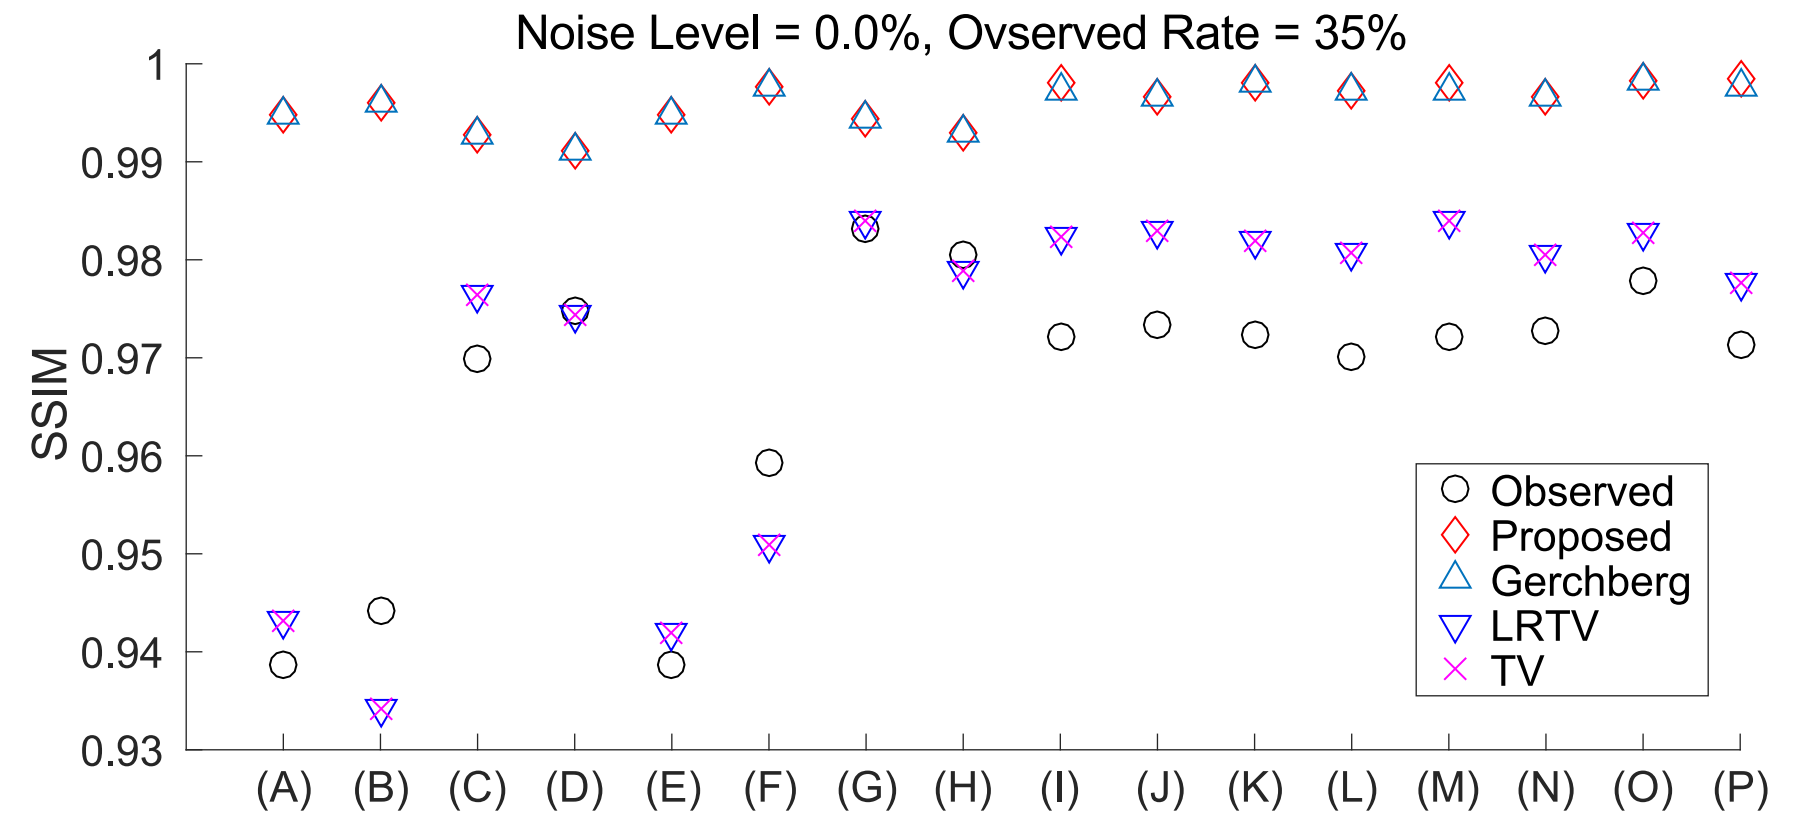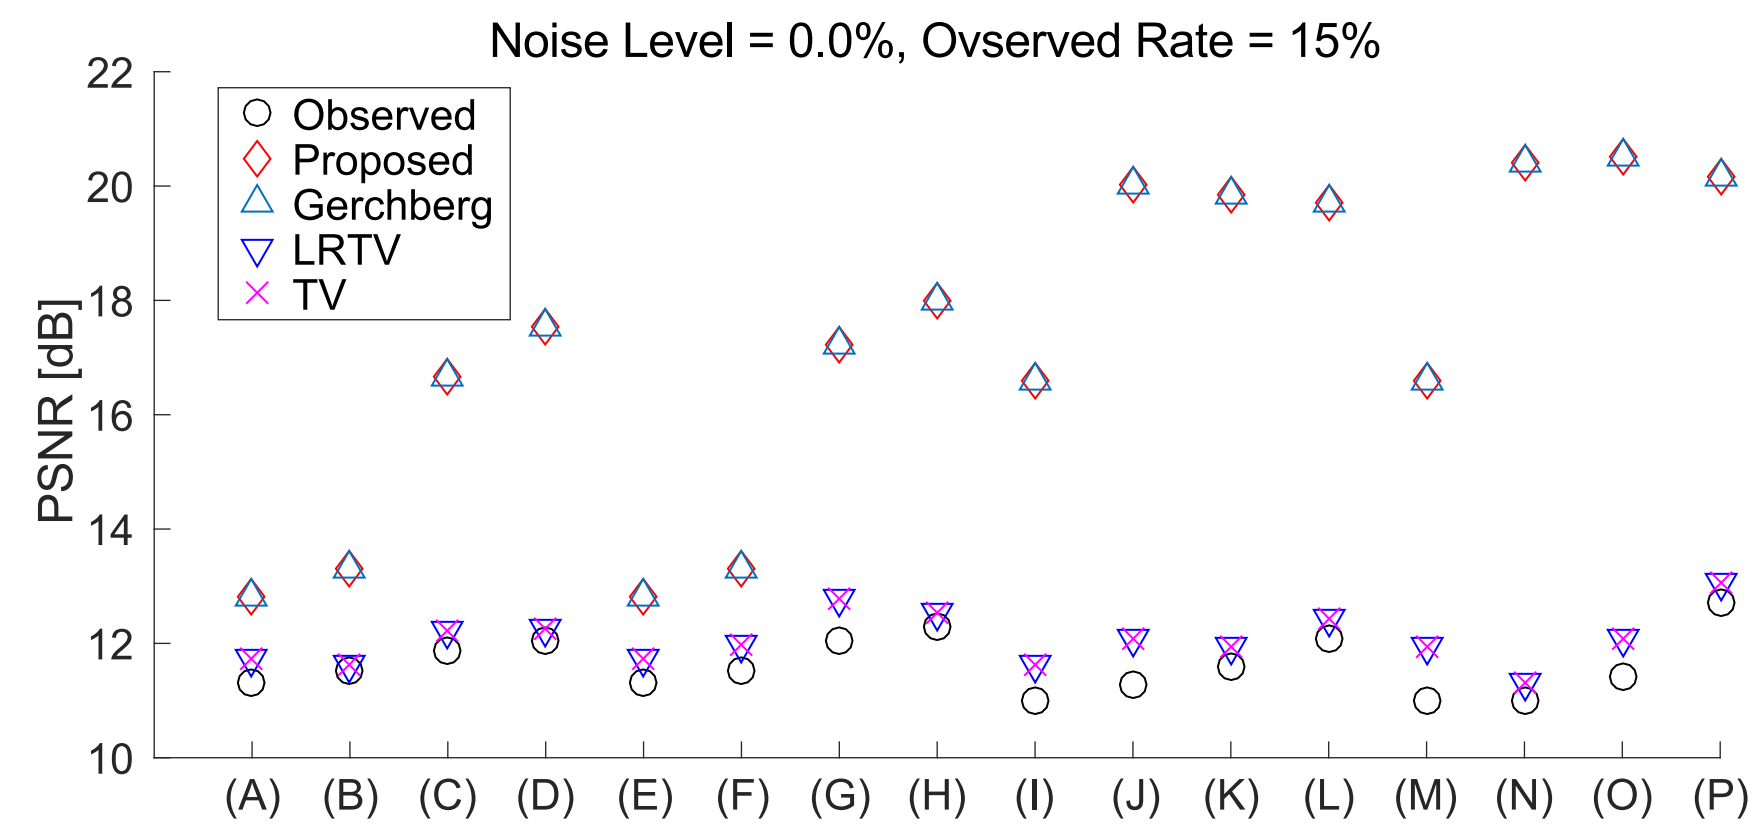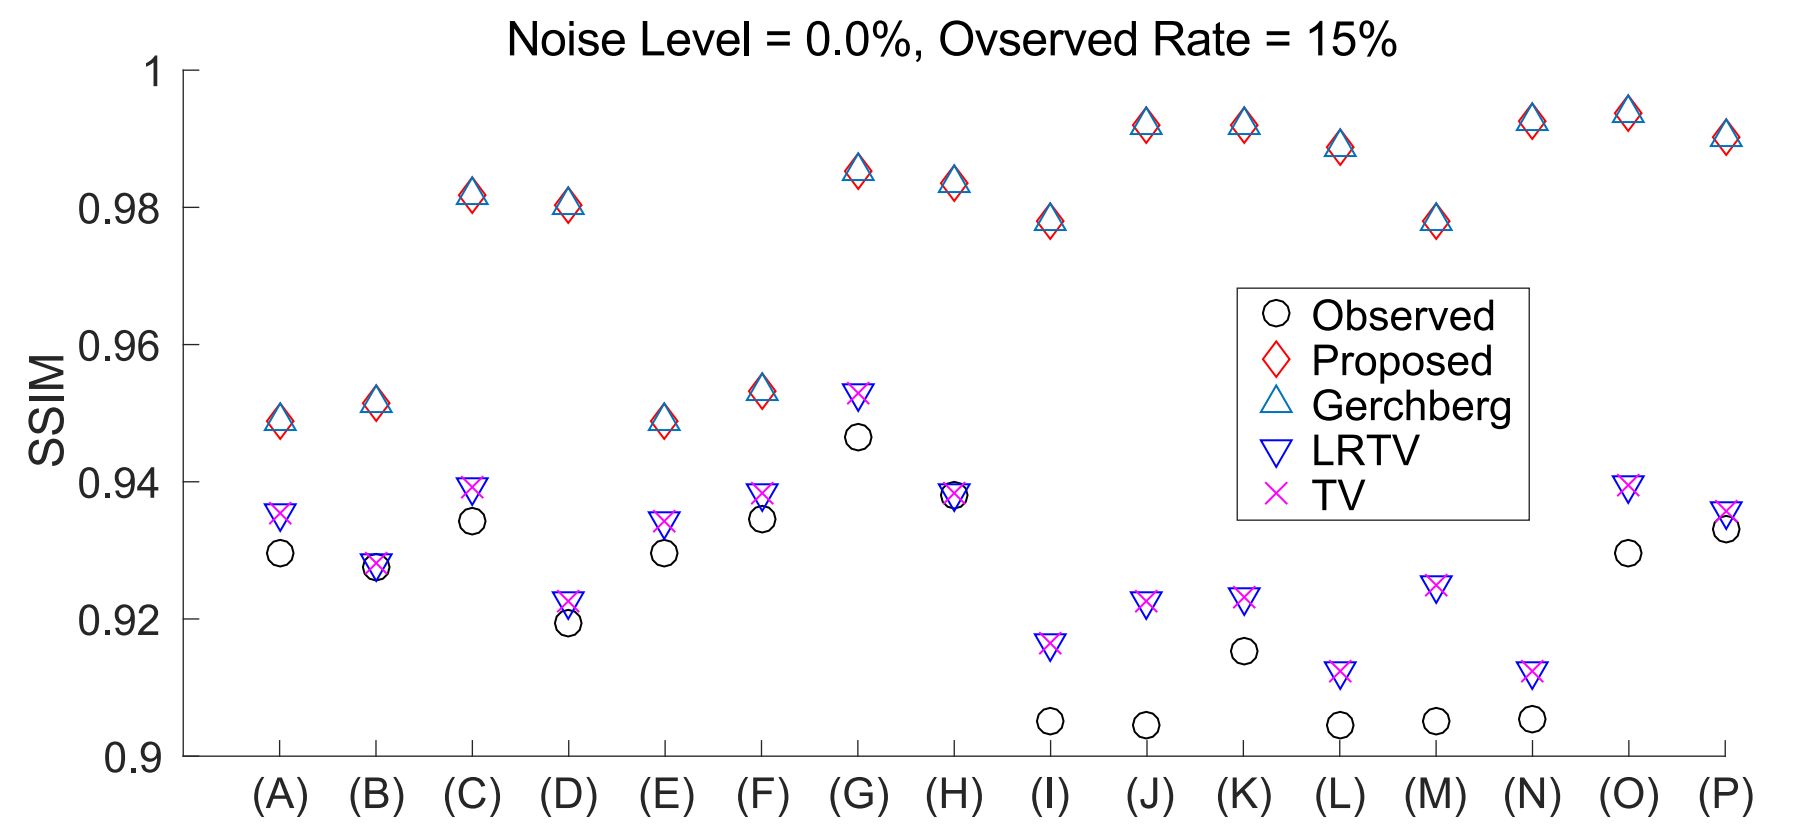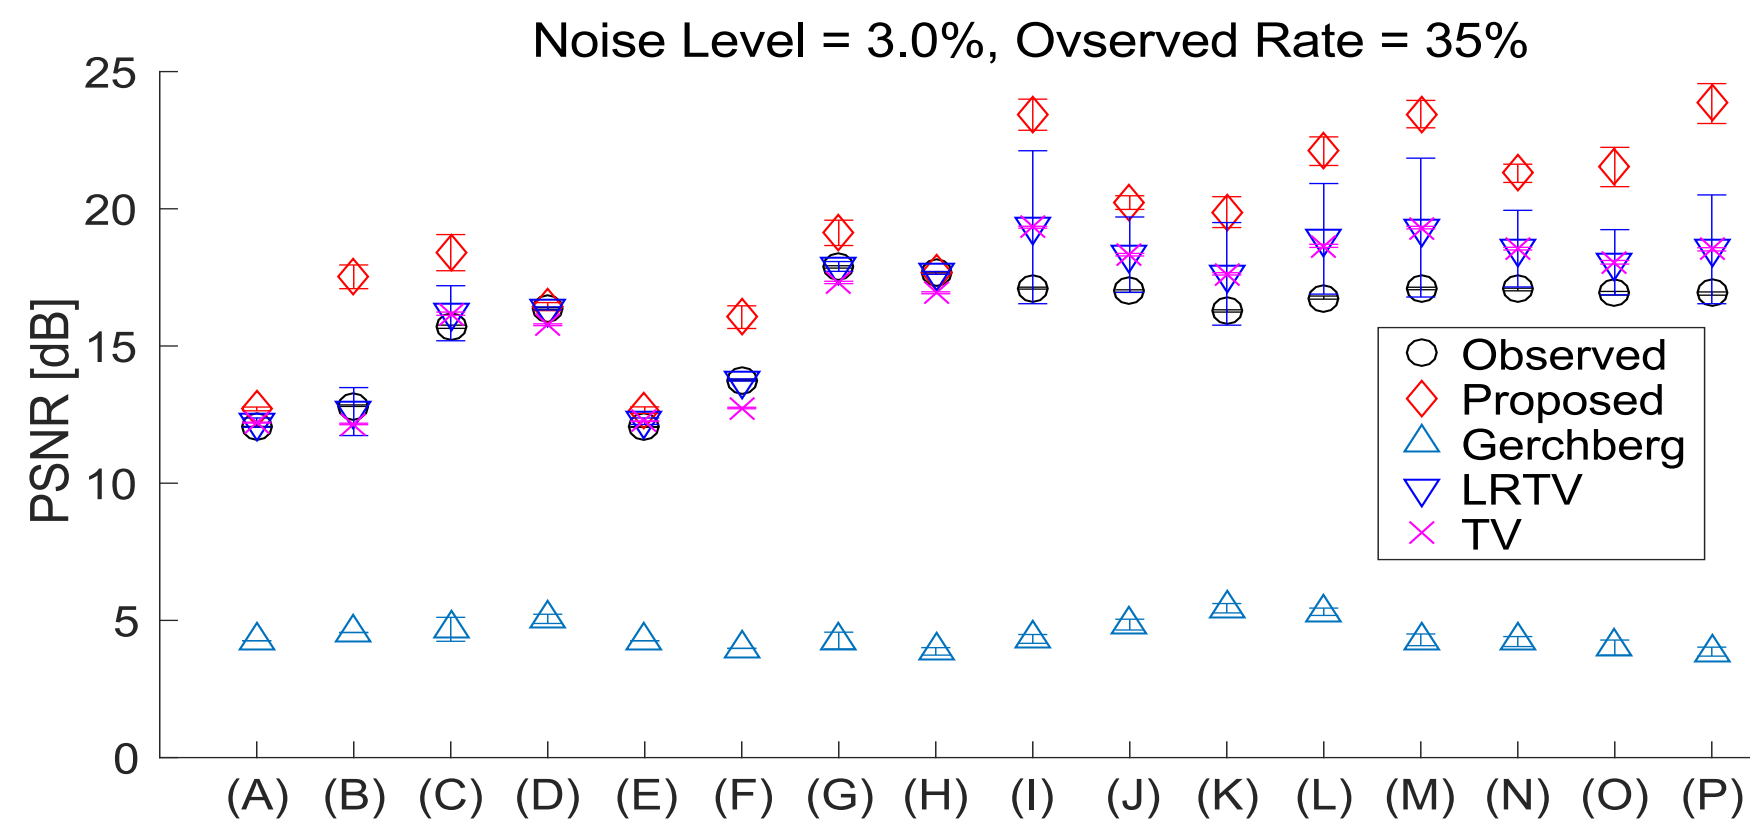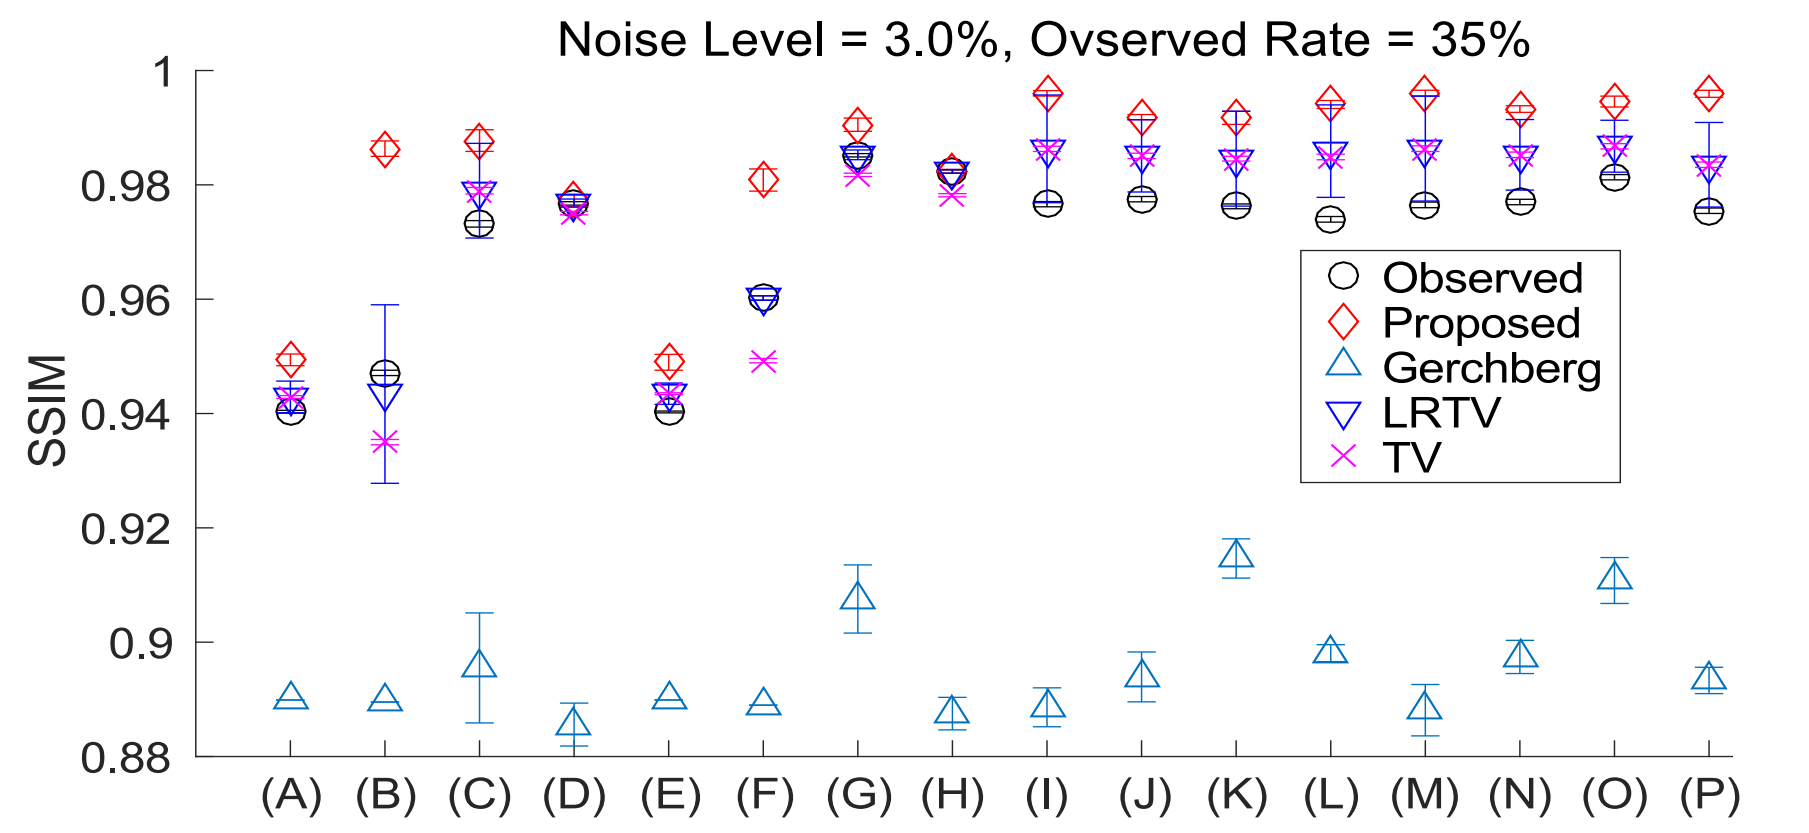

Supplement: f1 [file 9262847.f1.zip]
